# Supplementary material for: mRNA vaccine trafficking and resulting protein expression after intramuscular administration
Source: PubMed Central journal article supplement — Mol Ther Nucleic Acids. 2023 Nov 24;35(1):102083. doi: 10.1016/j.omtn.2023.102083 (PMC10755037; doi:10.1016/j.omtn.2023.102083), 2023-11-24
Supplement: mmc1.pdf [file mmc1.pdf]

**OMTN, Volume 35**

**Supplemental information**

**mRNA vaccine trafficking and resulting protein  
expression after intramuscular administration**

**Kimberly J. Hassett, Ivana Liric Rajlic, Kapil Bahl, Rebecca White, Kristen Cowens, Eric  
Jacquinet, and Kristine E. Burke**

## Supplemental Information

**Table S1.** Surface antibodies used in flow cytometry to identify specific cell types expressing protein in NHP

| Marker          | Clone        | Fluorophore |
|-----------------|--------------|-------------|
| Live/Dead (L/D) |              | FVD 780     |
| CD3             | SP34-2       | AF700       |
| CD20            | L27          | PerCPCy5.5  |
| HLA-DR          | L243         | BV711       |
| CD123           | 7G3          | BV421       |
| CD11c           | 3.9          | PE-Cy7      |
| CD86            | 2331 (FUN-1) | APC         |
| CD14            | M5E2         | BV510       |
| CD16            | 3G8          | PECF594     |
| CD1c            | AD5-8E7      | PE          |
| CD163           | GHI/61       | BV605       |
| eGFP            |              | eeGFP       |

**Table S2.** Primary markers for all NHP cell populations characterized.

| <b>NHP Subsets</b>             | <b>Primary Markers</b>                                           |
|--------------------------------|------------------------------------------------------------------|
| <b>Classical Monocytes</b>     | L/D- HLA-DR+ CD3- CD20- CD14+ CD16-                              |
| <b>Intermediate Monocytes</b>  | L/D- HLA-DR+ CD3- CD20- CD14+ CD16+                              |
| <b>Non-classical Monocytes</b> | L/D- HLA-DR+ CD3- CD20- CD14- CD16+                              |
| <b>CD1c+ Myeloid DCs</b>       | L/D- HLA-DR+ CD3- CD20- CD14- CD16-CD163- CD11c+<br>CD123- CD1c+ |
| <b>CD1c- Myeloid DCs</b>       | L/D- HLA-DR+ CD3- CD20- CD14- CD16-CD163- CD11c+<br>CD123- CD1c- |
| <b>Plasmacytoid DCs</b>        | L/D- HLA-DR+ CD3- CD20- CD14- CD16-CD163- CD11c-<br>CD123+       |
| <b>Activation</b>              | CD86                                                             |
| <b>B cells</b>                 | L/D- CD20+                                                       |
| <b>T cells</b>                 | L/D- CD3+                                                        |
| <b>Macrophages</b>             | L/D- CD3- CD20- HLA-DR+ CD163+                                   |

**Supplemental Figures**

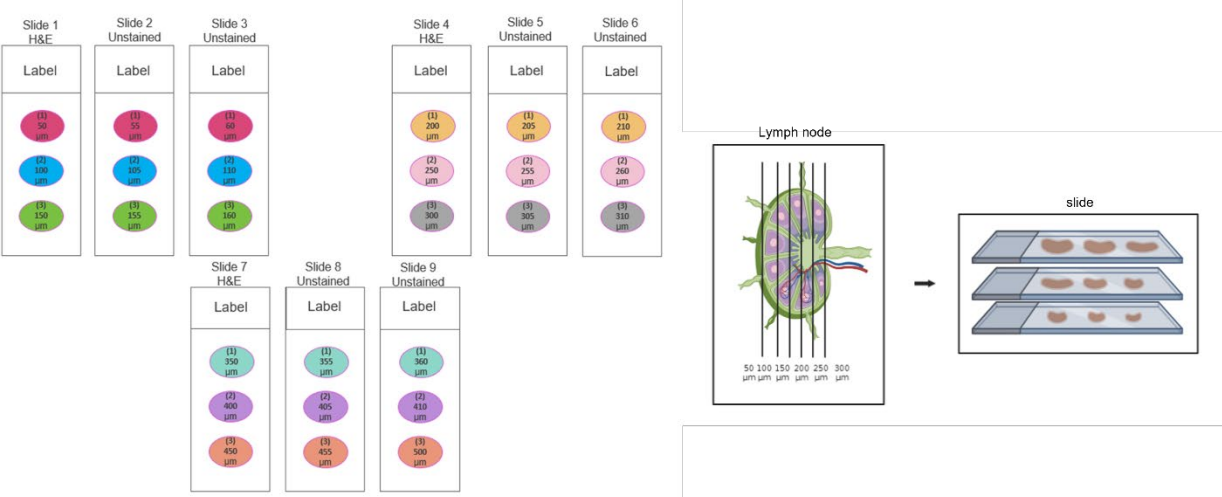

**Figure S1.** Diagram of step-sectioning technique. The figure illustrates step sectioning through the entire lymph node (LN) to determine the percentage of eGFP protein expression. Sections were taken at regular 50 $\mu$ m intervals to capture changes in protein expression as we cut deeper into the tissue. This information will help understand the distribution and variation of the eGFP protein within the LN. Some elements were created using BioRender.com. Scalebars range from 50  $\mu$ m to 500  $\mu$ m.

A.

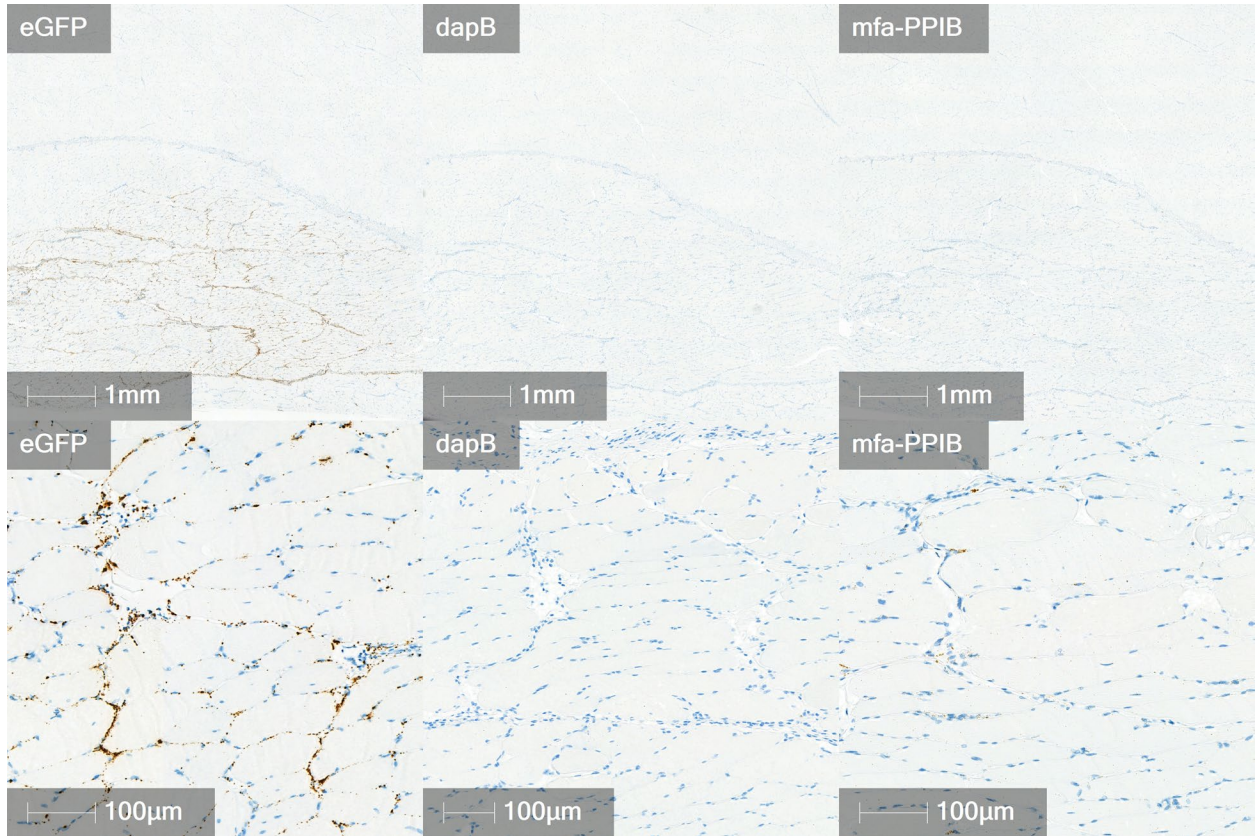

B.

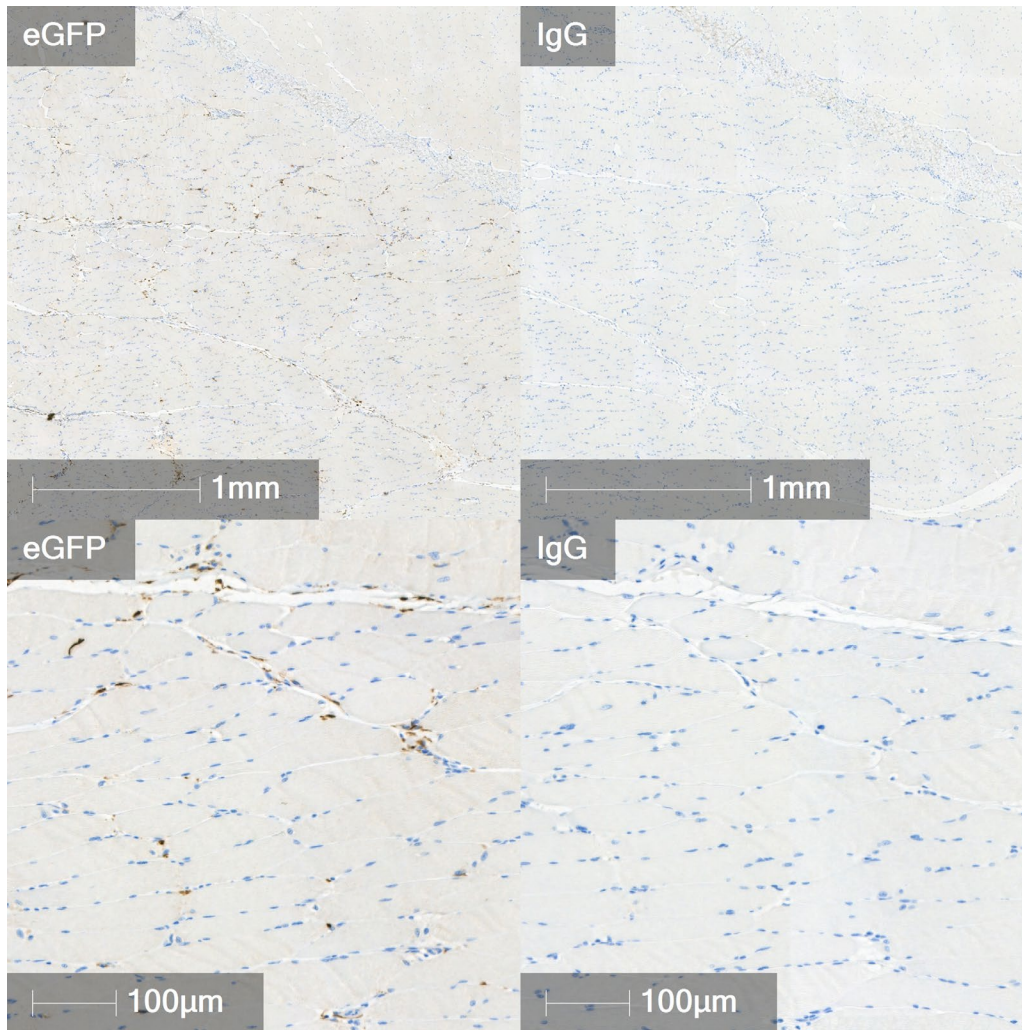

**Figure S2.** RNAscope and IHC eGFP labeling of NHP muscle at the injection site with technical controls. (A) Comparison of eGFP and control RNAscope probes which include the bacterial gene DapB (negative control) and the housekeeping gene *Macaca fascicularis* peptidylprolyl isomerase B (cyclophilin B) (mfa-PPIB) (positive control). (B) Comparison of anti-eGFP antibody and IgG isotype control staining at injection site. Area shown in insets is indicated in the low magnification images. Scalebars, 1 mm and 100  $\mu$ m.

A.

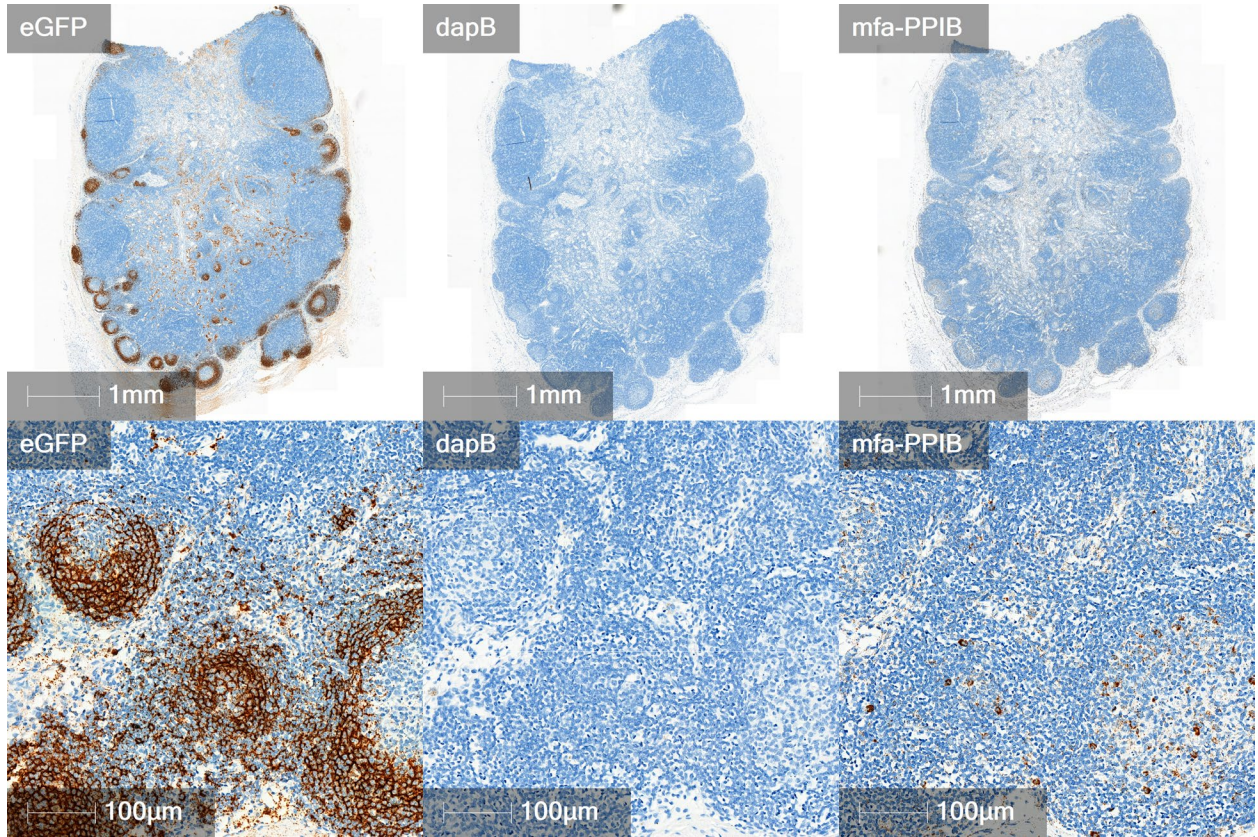

B.

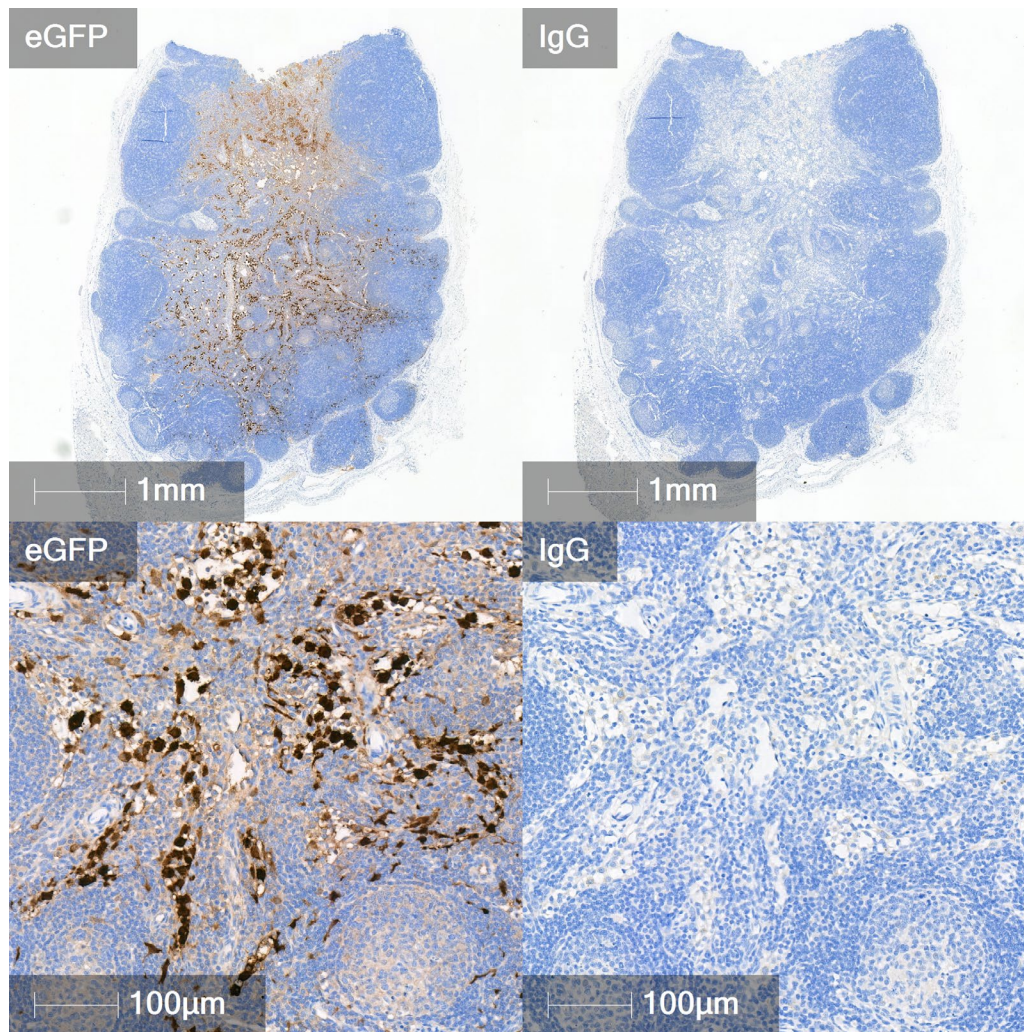

**Figure S3.** RNAscope and IHC eGFP labeling of NHP lymph node tissue with technical controls. (A) Comparison of eGFP and control RNAscope probes which include the bacterial gene DapB (negative control) and the housekeeping gene *Macaca fascicularis* peptidylprolyl isomerase B (cyclophilin B) (mfa-PPIB) (positive control). (B) Comparison of anti-eGFP antibody and IgG control staining in lymph node. Area shown in insets is indicated in the low magnification images. Scalebars, 1 mm and 100 µm.
